# Supplementary material for: Structure of cytochrome c at the interface with magnetic CoFe2O4 nanoparticles
Source: Royal Society of Chemistry journal article supplement (doi:10.1039/b711937b), 2008-01-01
Supplement: b711937b.pdf [file b711937b.pdf]

Supporting Information

## Structure of Cytochrome *c* at the interface with magnetic $\text{CoFe}_2\text{O}_4$ nanoparticles

Marie-Eve Aubin-Tam, Hui Zhou and Kimberly Hamad-Schifferli\*

Massachusetts Institute of Technology, Cambridge, MA 02139 USA

E-mail: schiffer@mit.edu

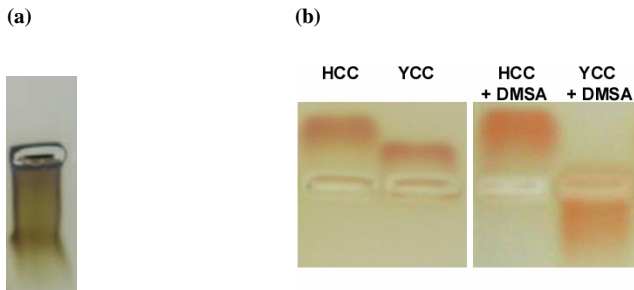

**Fig. S1** a) Agarose gel electrophoresis of  $\text{CoFe}_2\text{O}_4$  nanoparticles with DMSA ligands without  $\beta$ -mercaptoethanol treatment. b) Agarose gel electrophoresis of HCC and YCC, with and without DMSA. YCC is positively charged but runs toward positive electrode when incubated with DMSA, indicating that DMSA attaches to YCC C102.

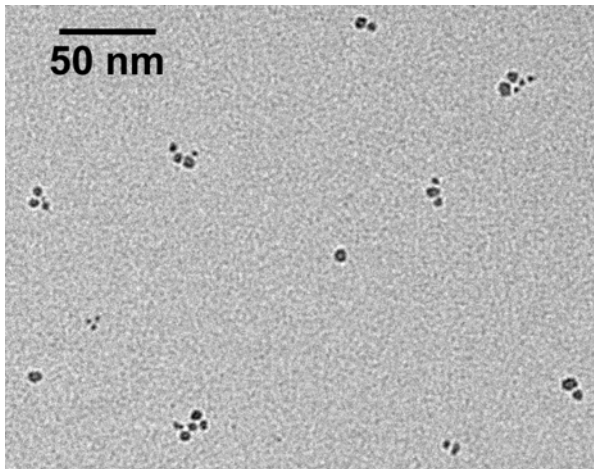

**Fig. S2** TEM of DMSA NPs, one month after purification.

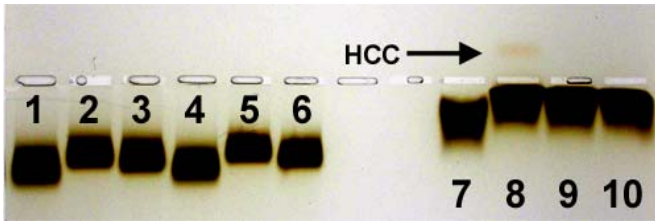

**Fig. S3** Color picture of gel in Fig. 3.

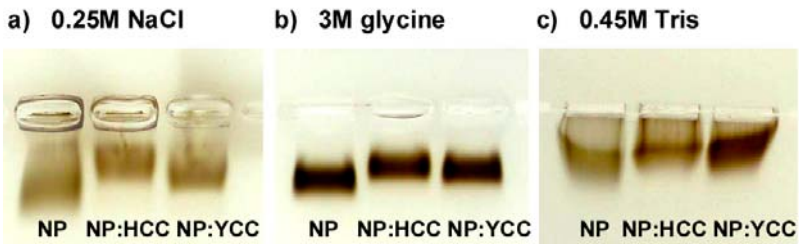

**Fig. S4** 1% agarose gel electrophoresis of NP incubated with CC in presence of 0.25M NaCl (a), 3M glycine (b) and 0.45M Tris (c).
